# Supplementary figures and images for: Transparent anemone shrimp (Ancylomenes pedersoni) become opaque after exercise and physiological stress in correlation with increased hemolymph perfusion
Source: Oxford University Press journal article supplement (doi:10.1242/jeb.162362), 2017-11-15

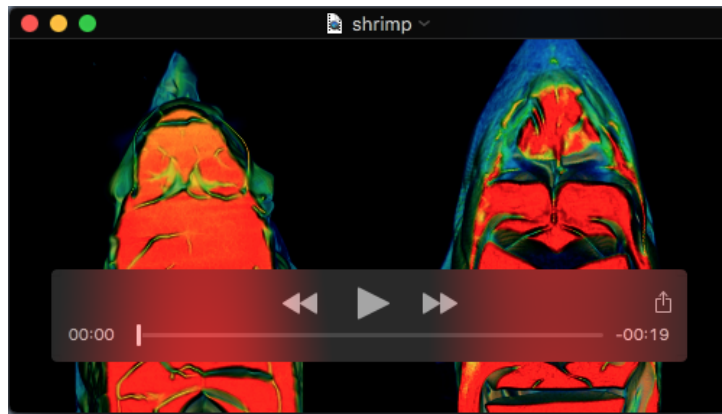

**Movie 1.** Control shrimp on left, experimental opaque shrimp on right

Supplement: jeb162362supp.pdf [file jeb162362supp.pdf]
